# Supplementary material
Source: Springer Nature journal article supplement (https://www.springerprofessional.de/resource/supplementary/13638_2014_915_MOESM12_ESM.pdf/11899222)

**Bundle Delivery Probability (%)**

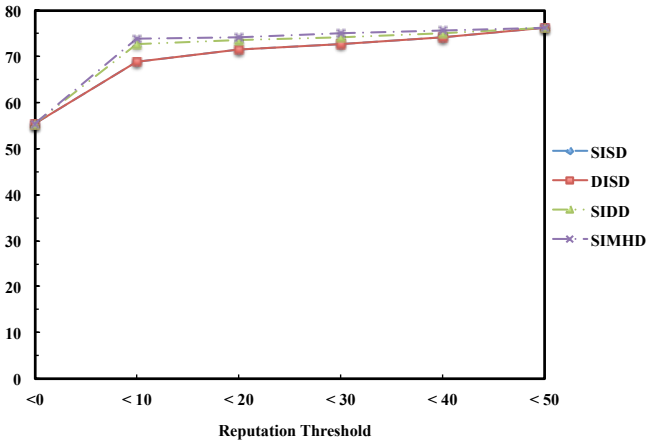

Supplement: MOESM12 [file 11899222]
